# Supplementary material for: Effect of Perioperative Lipid Status on Clinical Outcomes after Cardiac Surgery
Source: MDPI journal article supplement (doi:10.3390/cells10102717), 2021-10-11
Supplement: s1 [file s1]

## Supplementary Material

**Supplementary Table S1:** Baseline patient demographics and perioperative characteristics grouped by statin therapy

|                                          | All patients<br>(N=192) | Statin: No<br>(N=87) | Statin: Yes<br>(N=105) | P      |
|------------------------------------------|-------------------------|----------------------|------------------------|--------|
| <b>Demographics</b>                      |                         |                      |                        |        |
| Age (yr)                                 | 67.0 [60.0;73.0]        | 65.0 [57.5;73.5]     | 68.0 [62.0;73.0]       | 0.128  |
| Height (cm)                              | 173 (8.71)              | 173 (9.79)           | 173 (7.74)             | 0.554  |
| Weight (kg)                              | 80.4 [70.0;90.1]        | 80.1 [68.2;88.5]     | 81.4 [71.0;94.5]       | 0.283  |
| BMI (kg/m <sup>2</sup> )                 | 26.1 [23.7;30.4]        | 25.7 [23.6;29.5]     | 26.5 [23.8;30.7]       | 0.291  |
| Sex (Male)                               | 145 (75.5%)             | 56 (64.4%)           | 89 (84.8%)             | 0.002  |
| <b>Comorbidities</b>                     |                         |                      |                        |        |
| Diabetes (Yes)                           | 35 (18.2%)              | 7 (8.05%)            | 28 (26.7%)             | 0.002  |
| Diabetes on insulin                      |                         |                      |                        | 0.374  |
| No                                       | 24 (68.6%)              | 6 (85.7%)            | 18 (64.3%)             |        |
| Yes                                      | 11 (31.4%)              | 1 (14.3%)            | 10 (35.7%)             |        |
| Hypertension <sup>†</sup> (Yes)          | 130 (68.4%)             | 47 (54.7%)           | 83 (79.8%)             | <0.001 |
| Dyslipidaemia <sup>†</sup> (Yes)         | 111 (58.1%)             | 28 (32.2%)           | 83 (79.8%)             | <0.001 |
| Nicotine <sup>†</sup>                    |                         |                      |                        | 0.060  |
| Former smoker                            | 49 (26.1%)              | 16 (19.0%)           | 33 (31.7%)             |        |
| Non-smoker                               | 97 (51.6%)              | 51 (60.7%)           | 46 (44.2%)             |        |
| Smoker                                   | 42 (22.3%)              | 17 (20.2%)           | 25 (24.0%)             |        |
| Obesity (Yes)                            | 52 (27.1%)              | 20 (23.0%)           | 32 (30.5%)             | 0.318  |
| Preoperative renal disease (Yes)         | 43 (22.4%)              | 16 (18.4%)           | 27 (25.7%)             | 0.299  |
| Peripheral vascular disease <sup>†</sup> |                         |                      |                        | 0.366  |
| No                                       | 167 (93.8%)             | 75 (94.9%)           | 92 (92.9%)             |        |
| Stage 1                                  | 4 (2.25%)               | 1 (1.27%)            | 3 (3.03%)              |        |
| Stage 2                                  | 4 (2.25%)               | 1 (1.27%)            | 3 (3.03%)              |        |
| Stage 3                                  | 1 (0.56%)               | 0 (0.00%)            | 1 (1.01%)              |        |
| Stage 4                                  | 2 (1.12%)               | 2 (2.53%)            | 0 (0.00%)              |        |
| Carotid disease <sup>†</sup>             |                         |                      |                        | 0.168  |
| < 50%                                    | 1 (0.58%)               | 0 (0.00%)            | 1 (0.99%)              |        |
| >90%                                     | 3 (1.75%)               | 1 (1.43%)            | 2 (1.98%)              |        |
| 50-69%,                                  | 9 (5.26%)               | 1 (1.43%)            | 8 (7.92%)              |        |
| 70-89%                                   | 2 (1.17%)               | 0 (0.00%)            | 2 (1.98%)              |        |
| no                                       | 156 (91.2%)             | 68 (97.1%)           | 88 (87.1%)             |        |
| Myocardial infarction <sup>†</sup>       |                         |                      |                        | 0.004  |
| No MI                                    | 171 (89.5%)             | 85 (97.7%)           | 86 (82.7%)             |        |
| MI 0-7 days before operation             | 3 (1.57%)               | 1 (1.15%)            | 2 (1.92%)              |        |
| MI 8-90 days before operation            | 8 (4.19%)               | 0 (0.00%)            | 8 (7.69%)              |        |
| MI >90 days before operation             | 9 (4.71%)               | 1 (1.15%)            | 8 (7.69%)              |        |
| COPD <sup>†</sup> (Yes)                  | 23 (12.1%)              | 10 (11.5%)           | 13 (12.6%)             | 0.989  |
| NYHA <sup>†</sup>                        |                         |                      |                        | 0.254  |
| 1                                        | 60 (31.4%)              | 21 (24.4%)           | 39 (37.1%)             |        |
| 2                                        | 90 (47.1%)              | 44 (51.2%)           | 46 (43.8%)             |        |
| 3                                        | 38 (19.9%)              | 20 (23.3%)           | 18 (17.1%)             |        |
| 4                                        | 3 (1.57%)               | 1 (1.16%)            | 2 (1.90%)              |        |
| CCS <sup>†</sup>                         |                         |                      |                        | 0.001  |
| 0                                        | 118 (62.4%)             | 65 (76.5%)           | 53 (51.0%)             |        |
| 1                                        | 34 (18.0%)              | 13 (15.3%)           | 21 (20.2%)             |        |
| 2                                        | 25 (13.2%)              | 5 (5.88%)            | 20 (19.2%)             |        |
| 3                                        | 9 (4.76%)               | 2 (2.35%)            | 7 (6.73%)              |        |
| 4                                        | 3 (1.59%)               | 0 (0.00%)            | 3 (2.88%)              |        |
| Ejection fraction <sup>†</sup>           | 60.0 [55.0;65.0]        | 60.0 [55.0;65.0]     | 60.0 [57.0;65.0]       | 0.565  |
| EuroSCORE2 <sup>†</sup>                  | 1.73 [0.90;2.93]        | 2.03 [1.26;3.49]     | 1.44 [0.85;2.77]       | 0.050  |

|                                                          |                  |                  |                  |        |
|----------------------------------------------------------|------------------|------------------|------------------|--------|
| <b>Pre-operative lipids</b>                              |                  |                  |                  |        |
| <b>Cholesterol (mmol/L)</b>                              | 4.42 (1.13)      | 5.03 (1.04)      | 3.92 (0.94)      | <0.001 |
| <b>HDL cholesterol(mmol/L)</b>                           | 1.13 [0.92;1.35] | 1.20 [1.00;1.42] | 1.08 [0.88;1.31] | 0.012  |
| <b>LDL Cholesterol (mmol/L)</b>                          | 2.68 [2.14;3.40] | 3.25 [2.74;3.85] | 2.34 [1.98;2.70] | <0.001 |
| <b>Triglycerides (mmol/L)</b>                            | 1.33 [0.97;1.88] | 1.26 [0.95;1.75] | 1.34 [1.00;1.92] | 0.323  |
| <b>Perioperative Characteristics</b>                     |                  |                  |                  |        |
| <b>Aortic valve Surgery (Yes)</b>                        | 86 (44.8%)       | 45 (51.7%)       | 41 (39.0%)       | 0.107  |
| <b>Mitral valve surgery (Yes)</b>                        | 45 (23.4%)       | 31 (35.6%)       | 14 (13.3%)       | 0.001  |
| <b>Tricuspid valve surgery (Yes)</b>                     | 17 (8.85%)       | 13 (14.9%)       | 4 (3.81%)        | 0.014  |
| <b>Coronary Artery Bypass Surgery (Yes)</b>              | 77 (40.1%)       | 11 (12.6%)       | 66 (62.9%)       | <0.001 |
| <b>Ascending Aortic surgery (Yes)</b>                    | 38 (19.8%)       | 28 (32.2%)       | 10 (9.52%)       | <0.001 |
| <b>Aortic Arch Surgery (Yes)</b>                         | 11 (5.73%)       | 9 (10.3%)        | 2 (1.90%)        | 0.016  |
| <b>ECC or MiECC</b>                                      |                  |                  |                  | <0.001 |
| <b>ECC</b>                                               | 149 (77.6%)      | 85 (97.7%)       | 64 (61.0%)       |        |
| <b>MiECC</b>                                             | 43 (22.4%)       | 2 (2.30%)        | 41 (39.0%)       |        |
| <b>Bypass time (min)</b>                                 | 104 [80.0;132]   | 109 [86.0;134]   | 98.0 [76.0;132]  | 0.181  |
| <b>Aortic cross clamping (min)</b>                       | 68.5 [52.0;91.8] | 71.0 [52.0;96.0] | 67.0 [51.0;88.0] | 0.527  |
| <b>Lowest body temperature (deg C)</b>                   | 33.2 [32.1;33.8] | 32.4 [31.8;33.6] | 33.5 [32.6;34.0] | <0.001 |
| <b>Deep hypothermic cardiac arrest<sup>†</sup> (Yes)</b> | 19 (9.95%)       | 16 (18.4%)       | 3 (2.88%)        | 0.001  |
| <b>Operation duration (min)</b>                          | 234 [195;276]    | 211 [179;248]    | 255 [205;286]    | <0.001 |

**Supplementary Table S2: Demographics and comorbidities stratified according to the outcomes considered in this study**

| Characteristic                      | Postoperative Stroke |                     |       | Myocardial Infarction |                     |       | 30-day survival     |                     |       | 1-year survival     |                     |       |
|-------------------------------------|----------------------|---------------------|-------|-----------------------|---------------------|-------|---------------------|---------------------|-------|---------------------|---------------------|-------|
|                                     | No<br>N=179          | Yes<br>N=11         | P     | No<br>N=190           | Yes<br>N=2          | P     | Alive<br>N=190      | Deceased<br>N=2     | P     | Alive<br>N=179      | Deceased<br>N=7     | P     |
| <b>Age</b>                          | 67.0<br>[59.5;73.0]  | 69.0<br>[62.5;77.0] | 0.097 | 67.0<br>[60.0;73.0]   | 61.0<br>[60.5;61.5] | 0.312 | 67.0<br>[60.0;73.0] | 70.5<br>[69.8;71.2] | 0.514 | 67.0<br>[60.0;73.0] | 69.0<br>[62.0;70.5] | 0.810 |
| <b>Height</b>                       | 173 (8.61)           | 167 (9.54)          | 0.066 | 173 (8.73)            | 166 (1.41)          | 0.028 | 173 (8.62)          | 162 (14.8)          | 0.496 | 173 (8.76)          | 168 (9.14)          | 0.222 |
| <b>Weight</b>                       | 80.3<br>[70.0;90.6]  | 84.3<br>[77.3;88.5] | 0.374 | 80.8<br>[70.0;90.2]   | 71.5<br>[70.8;72.2] | 0.288 | 80.3<br>[70.0;90.2] | 89.0<br>[88.5;89.5] | 0.277 | 81.4<br>[70.0;91.2] | 78.5<br>[66.0;83.6] | 0.311 |
| <b>BMI</b>                          | 25.9<br>[23.6;30.3]  | 28.8<br>[27.1;35.0] | 0.054 | 26.1<br>[23.7;30.4]   | 25.9<br>[25.8;26.0] | 0.939 | 26.0<br>[23.7;30.4] | 34.1<br>[32.1;36.1] | 0.091 | 26.1<br>[23.6;30.4] | 25.6<br>[22.0;28.5] | 0.545 |
| <b>Sex:</b>                         |                      |                     | 0.002 |                       |                     | 0.052 |                     |                     | 0.434 |                     |                     | 1.000 |
| Female                              | 39 (21.8%)           | 8 (72.7%)           |       | 45 (23.7%)            | 2 (100%)            |       | 46 (24.2%)          | 1 (50.0%)           |       | 43 (24.0%)          | 2 (28.6%)           |       |
| Male                                | 140<br>(78.2%)       | 3 (27.3%)           |       | 145<br>(76.3%)        | 0 (0.00%)           |       | 144<br>(75.8%)      | 1 (50.0%)           |       | 136<br>(76.0%)      | 5 (71.4%)           |       |
| <b>Diabetes:</b>                    |                      |                     | 0.698 |                       |                     | 1.000 |                     |                     | 0.320 |                     |                     | 0.090 |
| No                                  | 147<br>(82.1%)       | 10 (90.9%)          |       | 155<br>(81.6%)        | 2 (100%)            |       | 156<br>(82.1%)      | 1 (50.0%)           |       | 149<br>(83.2%)      | 4 (57.1%)           |       |
| Yes                                 | 32 (17.9%)           | 1 (9.09%)           |       | 35 (18.4%)            | 0 (0.00%)           |       | 34 (17.9%)          | 1 (50.0%)           |       | 30 (16.8%)          | 3 (42.9%)           |       |
| <b>Hypertension:</b>                |                      |                     | 0.755 |                       |                     | 1.000 |                     |                     | 0.555 |                     |                     | 0.668 |
| No                                  | 57 (32.2%)           | 3 (27.3%)           |       | 59 (31.4%)            | 1 (50.0%)           |       | 60 (31.9%)          | 0 (0.00%)           |       | 58 (32.6%)          | 1 (16.7%)           |       |
| Yes                                 | 120<br>(67.8%)       | 8 (72.7%)           |       | 129<br>(68.6%)        | 1 (50.0%)           |       | 128<br>(68.1%)      | 2 (100%)            |       | 120<br>(67.4%)      | 5 (83.3%)           |       |
| <b>Dyslipidaemia:</b>               |                      |                     | 0.205 |                       |                     | 0.512 |                     |                     | 1.000 |                     |                     | 0.700 |
| No                                  | 72 (40.4%)           | 7 (63.6%)           |       | 80 (42.3%)            | 0 (0.00%)           |       | 79 (41.8%)          | 1 (50.0%)           |       | 73 (40.8%)          | 3 (50.0%)           |       |
| Yes                                 | 106<br>(59.6%)       | 4 (36.4%)           |       | 109<br>(57.7%)        | 2 (100%)            |       | 110<br>(58.2%)      | 1 (50.0%)           |       | 106<br>(59.2%)      | 3 (50.0%)           |       |
| <b>Nicotine:</b>                    |                      |                     | 0.443 |                       |                     | 0.741 |                     |                     | 0.727 |                     |                     | 0.149 |
| Former smoker                       | 47 (26.9%)           | 1 (9.09%)           |       | 49 (26.3%)            | 0 (0.00%)           |       | 49 (26.3%)          | 0 (0.00%)           |       | 47 (26.6%)          | 0 (0.00%)           |       |
| Non-smoker                          | 90 (51.4%)           | 7 (63.6%)           |       | 96 (51.6%)            | 1 (50.0%)           |       | 96 (51.6%)          | 1 (50.0%)           |       | 91 (51.4%)          | 3 (50.0%)           |       |
| Smoker                              | 38 (21.7%)           | 3 (27.3%)           |       | 41 (22.0%)            | 1 (50.0%)           |       | 41 (22.0%)          | 1 (50.0%)           |       | 39 (22.0%)          | 3 (50.0%)           |       |
| <b>Obesity:</b>                     |                      |                     | 0.159 |                       |                     | 0.607 |                     |                     | 0.086 |                     |                     | 1.000 |
| No                                  | 133<br>(74.3%)       | 6 (54.5%)           |       | 138<br>(72.6%)        | 2 (100%)            |       | 140<br>(73.7%)      | 0 (0.00%)           |       | 130<br>(72.6%)      | 5 (71.4%)           |       |
| Yes                                 | 46 (25.7%)           | 5 (45.5%)           |       | 52 (27.4%)            | 0 (0.00%)           |       | 50 (26.3%)          | 2 (100%)            |       | 49 (27.4%)          | 2 (28.6%)           |       |
| <b>Preoperative renal disease:</b>  |                      |                     | 0.674 |                       |                     | 0.415 |                     |                     | 0.059 |                     |                     | 0.004 |
| No                                  | 140<br>(78.2%)       | 8 (72.7%)           |       | 148<br>(77.9%)        | 1 (50.0%)           |       | 149<br>(78.4%)      | 0 (0.00%)           |       | 143<br>(79.9%)      | 2 (28.6%)           |       |
| Yes                                 | 39 (21.8%)           | 3 (27.3%)           |       | 42 (22.1%)            | 1 (50.0%)           |       | 41 (21.6%)          | 2 (100%)            |       | 36 (20.1%)          | 5 (71.4%)           |       |
| <b>Peripheral vascular disease:</b> |                      |                     | 1.000 |                       |                     | 0.101 |                     |                     | 1.000 |                     |                     | 0.296 |
| No                                  | 154<br>(93.3%)       | 11 (100%)           |       | 166<br>(94.3%)        | 1 (50.0%)           |       | 165<br>(93.8%)      | 2 (100%)            |       | 158<br>(94.0%)      | 4 (80.0%)           |       |
| Stadium 1                           | 4 (2.42%)            | 0 (0.00%)           |       | 3 (1.70%)             | 1 (50.0%)           |       | 4 (2.27%)           | 0 (0.00%)           |       | 4 (2.38%)           | 0 (0.00%)           |       |
| Stadium 2                           | 4 (2.42%)            | 0 (0.00%)           |       | 4 (2.27%)             | 0 (0.00%)           |       | 4 (2.27%)           | 0 (0.00%)           |       | 3 (1.79%)           | 1 (20.0%)           |       |
| Stadium 3                           | 1 (0.61%)            | 0 (0.00%)           |       | 1 (0.57%)             | 0 (0.00%)           |       | 1 (0.57%)           | 0 (0.00%)           |       | 1 (0.60%)           | 0 (0.00%)           |       |
| Stadium 4                           | 2 (1.21%)            | 0 (0.00%)           |       | 2 (1.14%)             | 0 (0.00%)           |       | 2 (1.14%)           | 0 (0.00%)           |       | 2 (1.19%)           | 0 (0.00%)           |       |
| <b>Carotid disease:</b>             |                      |                     | 0.367 |                       |                     | 0.039 |                     |                     | 1.000 |                     |                     | 0.487 |
| < 50%                               | 1 (0.63%)            | 0 (0.00%)           |       | 1 (0.59%)             | 0 (0.00%)           |       | 1 (0.59%)           | 0 (0.00%)           |       | 1 (0.63%)           | 0 (0.00%)           |       |
| >90%                                | 2 (1.26%)            | 1 (10.0%)           |       | 3 (1.78%)             | 0 (0.00%)           |       | 3 (1.78%)           | 0 (0.00%)           |       | 3 (1.89%)           | 0 (0.00%)           |       |
| 50-69%,                             | 9 (5.66%)            | 0 (0.00%)           |       | 9 (5.33%)             | 0 (0.00%)           |       | 9 (5.33%)           | 0 (0.00%)           |       | 7 (4.40%)           | 1 (14.3%)           |       |
| 70-89%                              | 2 (1.26%)            | 0 (0.00%)           |       | 1 (0.59%)             | 1 (50.0%)           |       | 2 (1.18%)           | 0 (0.00%)           |       | 2 (1.26%)           | 0 (0.00%)           |       |
| no                                  | 145<br>(91.2%)       | 9 (90.0%)           |       | 155<br>(91.7%)        | 1 (50.0%)           |       | 154<br>(91.1%)      | 2 (100%)            |       | 146<br>(91.8%)      | 6 (85.7%)           |       |
| <b>COPD:</b>                        |                      |                     | 1.000 |                       |                     | 0.237 |                     |                     | 0.221 |                     |                     | 0.213 |
| No                                  | 156<br>(88.1%)       | 10 (90.9%)          |       | 166<br>(88.3%)        | 1 (50.0%)           |       | 166<br>(88.3%)      | 1 (50.0%)           |       | 156<br>(88.1%)      | 5 (71.4%)           |       |
| Yes                                 | 21 (11.9%)           | 1 (9.09%)           |       | 22 (11.7%)            | 1 (50.0%)           |       | 22 (11.7%)          | 1 (50.0%)           |       | 21 (11.9%)          | 2 (28.6%)           |       |
| <b>NYHA:</b>                        |                      |                     | 0.923 |                       |                     | 1.000 |                     |                     | 0.077 |                     |                     | 0.154 |
| 1                                   | 57 (32.0%)           | 3 (27.3%)           |       | 59 (31.2%)            | 1 (50.0%)           |       | 60 (31.7%)          | 0 (0.00%)           |       | 56 (31.5%)          | 2 (28.6%)           |       |
| 2                                   | 84 (47.2%)           | 6 (54.5%)           |       | 89 (47.1%)            | 1 (50.0%)           |       | 90 (47.6%)          | 0 (0.00%)           |       | 86 (48.3%)          | 1 (14.3%)           |       |
| 3                                   | 34 (19.1%)           | 2 (18.2%)           |       | 38 (20.1%)            | 0 (0.00%)           |       | 36 (19.0%)          | 2 (100%)            |       | 33 (18.5%)          | 4 (57.1%)           |       |
| 4                                   | 3 (1.69%)            | 0 (0.00%)           |       | 3 (1.59%)             | 0 (0.00%)           |       | 3 (1.59%)           | 0 (0.00%)           |       | 3 (1.69%)           | 0 (0.00%)           |       |
| <b>CCS:</b>                         |                      |                     | 0.557 |                       |                     | 1.000 |                     |                     | 0.377 |                     |                     | 1.000 |
| 0                                   | 110<br>(62.1%)       | 8 (72.7%)           |       | 116<br>(62.0%)        | 2 (100%)            |       | 117<br>(62.6%)      | 1 (50.0%)           |       | 111<br>(63.1%)      | 5 (71.4%)           |       |
| 1                                   | 31 (17.5%)           | 3 (27.3%)           |       | 34 (18.2%)            | 0 (0.00%)           |       | 34 (18.2%)          | 0 (0.00%)           |       | 31 (17.6%)          | 1 (14.3%)           |       |
| 2                                   | 24 (13.6%)           | 0 (0.00%)           |       | 25 (13.4%)            | 0 (0.00%)           |       | 24 (12.8%)          | 1 (50.0%)           |       | 22 (12.5%)          | 1 (14.3%)           |       |
| 3                                   | 9 (5.08%)            | 0 (0.00%)           |       | 9 (4.81%)             | 0 (0.00%)           |       | 9 (4.81%)           | 0 (0.00%)           |       | 9 (5.11%)           | 0 (0.00%)           |       |
| 4                                   | 3 (1.69%)            | 0 (0.00%)           |       | 3 (1.60%)             | 0 (0.00%)           |       | 3 (1.60%)           | 0 (0.00%)           |       | 3 (1.70%)           | 0 (0.00%)           |       |
| <b>Ejection Fraction</b>            | 60.0<br>[55.0;65.0]  | 60.0<br>[54.5;62.5] | 0.625 | 60.0<br>[55.0;65.0]   | 57.5<br>[53.8;61.2] | 0.910 | 60.0<br>[55.0;65.0] | 30.0<br>[30.0;30.0] | 0.020 | 60.0<br>[55.0;65.0] | 40.0<br>[30.0;62.5] | 0.078 |

| Characteristic    | Postoperative Stroke |                     |       | Myocardial Infarction |                     |       | 30-day survival     |                     |       | 1-year survival     |                     |       |
|-------------------|----------------------|---------------------|-------|-----------------------|---------------------|-------|---------------------|---------------------|-------|---------------------|---------------------|-------|
|                   | No<br>N=179          | Yes<br>N=11         | P     | No<br>N=190           | Yes<br>N=2          | P     | Alive<br>N=190      | Deceased<br>N=2     | P     | Alive<br>N=179      | Deceased<br>N=7     | P     |
| <b>EuroSCORE2</b> | 1.65<br>[0.88;2.80]  | 3.69<br>[2.36;7.58] | 0.005 | 1.69<br>[0.90;2.92]   | 5.87<br>[4.09;7.65] | 0.178 | 1.69<br>[0.90;2.91] | 14.1<br>[12.4;15.8] | 0.019 | 1.76<br>[0.90;2.91] | 1.96<br>[1.35;7.85] | 0.281 |
| <b>Logistic</b>   | 4.50                 | 17.4                | 0.001 | 4.65                  | 8.46                | 0.222 | 4.65                | 11.1                | 0.207 | 4.65                | 5.92                | 0.541 |
| <b>EuroSCORE</b>  | [2.29;7.44]          | [6.56;22.1]         |       | [2.33;7.94]           | [7.77;9.15]         |       | [2.33;7.94]         | [8.52;13.7]         |       | [2.36;8.19]         | [3.37;11.3]         |       |
| <b>Additive</b>   | 5.00                 | 10.0                | 0.001 | 6.00                  | 7.50                | 0.217 | 6.00                | 7.50                | 0.278 | 6.00                | 6.00                | 0.702 |
| <b>EuroSCORE</b>  | [3.00;7.00]          | [6.50;11.0]         | 0.005 | [3.00;7.00]           | [7.25;7.75]         | 1.000 | [3.00;7.00]         | [6.75;8.25]         | 1.000 | [3.00;7.50]         | [4.00;8.00]         | 1.000 |
| <b>Statin:</b>    |                      |                     |       |                       |                     |       |                     |                     |       |                     |                     |       |
| No                | 77 (43.0%)           | 10 (90.9%)          |       | 86 (45.3%)            | 1 (50.0%)           |       | 86 (45.3%)          | 1 (50.0%)           |       | 82 (45.8%)          | 3 (42.9%)           |       |
| Yes               | 102<br>(57.0%)       | 1 (9.09%)           |       | 104<br>(54.7%)        | 1 (50.0%)           |       | 104<br>(54.7%)      | 1 (50.0%)           |       | 97 (54.2%)          | 4 (57.1%)           |       |

**Supplementary Table S3:** Effect of cardiopulmonary bypass time as a potential confounder for postoperative stroke

| Covariate                                      | Logistic Regression<br>(univariable) |       |                    |       | Elastic net<br>(multivariable) |               | Elastic net<br>(multivariable; with additional bypass time as confounder) |               |
|------------------------------------------------|--------------------------------------|-------|--------------------|-------|--------------------------------|---------------|---------------------------------------------------------------------------|---------------|
|                                                | OR                                   | P     | OR (adjusted)      | P     | OR                             | OR (adjusted) | OR                                                                        | OR (adjusted) |
| <b>Cholesterol (preops)</b>                    | 2.12 (1.23, 3.82)                    | 0.008 | 1.48 (0.74, 3.17)  | 0.284 | 1.25                           | 1.13          | 1.25                                                                      | 1.24          |
| <b>Cholesterol (<math>\Delta</math>)</b>       | 0.46 (0.20, 1.05)                    | 0.062 | 0.29 (0.07, 0.90)  | 0.047 | 0.97                           | 0.78          | 0.97                                                                      | 0.75          |
| <b>HDL Cholesterolin (preops)</b>              | 3.12 (0.45, 20.64)                   | 0.239 | 1.95 (0.15, 28.40) | 0.612 | -                              | 0.46          |                                                                           | 0.30          |
| <b>HDL Cholesterolin (<math>\Delta</math>)</b> | 0.08 (0.00, 1.78)                    | 0.104 | 0.01 (0.00, 0.78)  | 0.039 | 0.30                           | 0.08          | 0.30                                                                      | 0.08          |
| <b>LDL Cholesterolin (preops)</b>              | 2.51 (1.27, 5.21)                    | 0.010 | 1.68 (0.69, 4.53)  | 0.272 | 1.39                           | 1.33          | 1.39                                                                      | 1.44          |
| <b>LDL Cholesterolin (<math>\Delta</math>)</b> | 0.27 (0.08, 0.91)                    | 0.035 | 0.19 (0.03, 0.88)  | 0.045 | 0.86                           | 0.67          | 0.86                                                                      | 0.95          |
| <b>Triglyceride (preops)</b>                   | 1.03 (0.44, 1.89)                    | 0.937 | 0.82 (0.28, 2.07)  | 0.699 | -                              | 0.91          |                                                                           | 0.67          |
| <b>Triglyceride (<math>\Delta</math>)</b>      | 1.2 (0.41, 5.28)                     | 0.777 | 0.91 (0.25, 4.14)  | 0.890 | -                              | 0.92          |                                                                           | 0.68          |

**Supplementary Table S4: Missing Data**

| <b>Variable</b>                 | <b>Number of missing values (% of total)</b> |
|---------------------------------|----------------------------------------------|
| Age (yr)                        | 0 (0.00%)                                    |
| Height (cm)                     | 0 (0.00%)                                    |
| Weight (kg)                     | 0 (0.00%)                                    |
| BMI (kg/m <sup>2</sup> )        | 0 (0.00%)                                    |
| Sex                             | 0 (0.00%)                                    |
| Diabetes                        | 0 (0.00%)                                    |
| Diabetes on insulin             | 157 (81.8%)                                  |
| Hypertension                    | 2 (1.04%)                                    |
| Dyslipidaemia                   | 1 (0.52%)                                    |
| Nicotine                        | 4 (2.08%)                                    |
| Adipositas                      | 0 (0.00%)                                    |
| Preoperative renal disease      | 0 (0.00%)                                    |
| Peripheral vascular disease     | 14 (7.29%)                                   |
| Carotid disease                 | 21 (10.9%)                                   |
| Myocardial infarction           | 1 (0.52%)                                    |
| COPD                            | 2 (1.04%)                                    |
| NYHA                            | 1 (0.52%)                                    |
| CCS                             | 3 (1.56%)                                    |
| Ejection fraction               | 1 (0.52%)                                    |
| EuroSCORE2                      | 8 (4.17%)                                    |
| Logistic EuroSCORE              | 5 (2.60%)                                    |
| Aortic valve                    | 0 (0.00%)                                    |
| Mitral valve                    | 0 (0.00%)                                    |
| Tricuspid valve                 | 0 (0.00%)                                    |
| Coronary Artery Bypass          | 0 (0.00%)                                    |
| Ascending Aortic                | 0 (0.00%)                                    |
| Aortic Arch                     | 0 (0.00%)                                    |
| Cholesterol (mmol/L)            | 0 (0.00%)                                    |
| HDL cholesterol (mmol/L)        | 0 (0.00%)                                    |
| LDL Cholesterol (mmol/L)        | 0 (0.00%)                                    |
| Quotient overall (.)            | 0 (0.00%)                                    |
| Triglycerides (mmol/L)          | 0 (0.00%)                                    |
| Lipoprotein(a) (mg/dl)          | 0 (0.00%)                                    |
| ECC or MiECC                    | 0 (0.00%)                                    |
| Bypass time (min)               | 0 (0.00%)                                    |
| Aortic cross clamping (min)     | 0 (0.00%)                                    |
| Lowest body temperature (deg C) | 0 (0.00%)                                    |
| Deep hypothermic cardiac arrest | 1 (0.52%)                                    |
| Operation duration (min)        | 0 (0.00%)                                    |

**Supplementary Figure S5:** Time series of cholesterol (a), HDL-C (b), LDL-C (c), and triglycerides (d) for the baseline, pre-operative, intra-operative and post-operative time points *for those patients only who did not receive any blood transfusion perioperatively*. Shown are medians and interquartile ranges at the different time points (black dots and black lines) and time series of individual patients (grey lines).

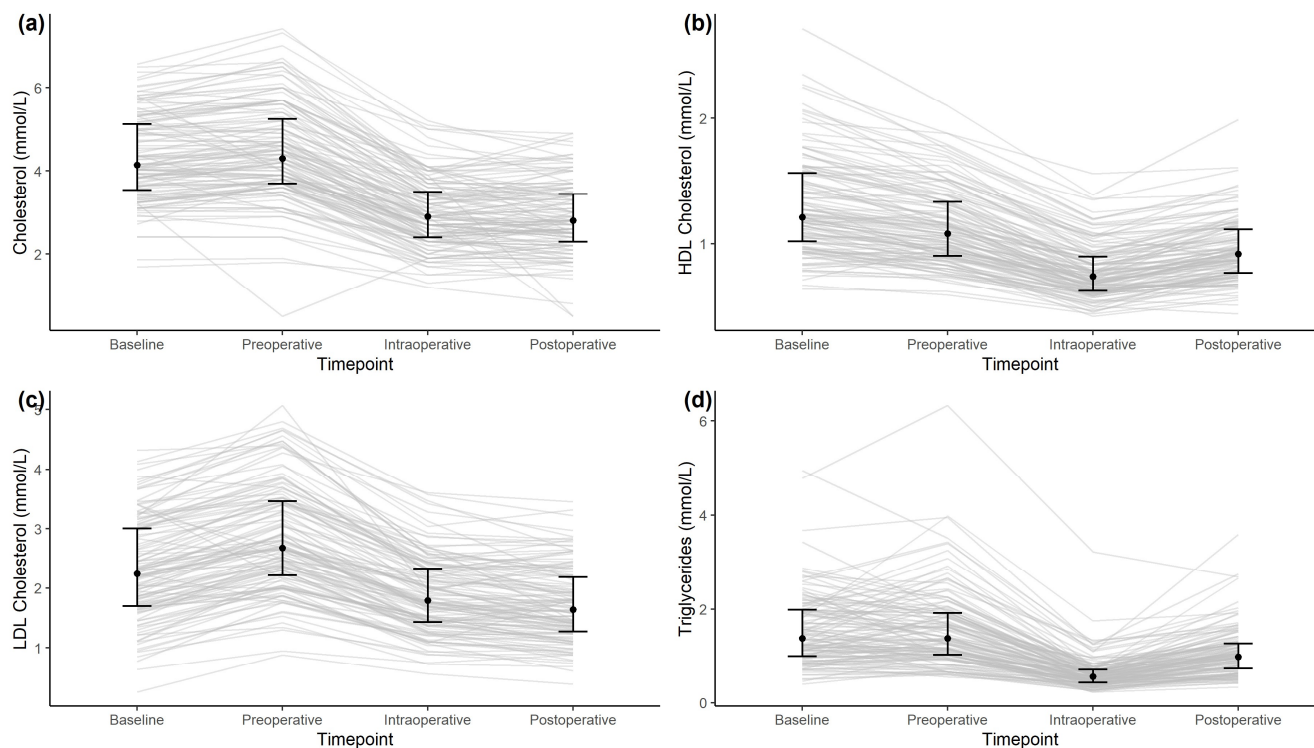

**Supplementary Table S6:** Descriptive statistics of cholesterol, HDL-C, LDL-C, and triglycerides at the different time points *for those patients only who did not receive any blood transfusion perioperatively*. Means and interquartile ranges are shown and P values indicate if the lipid values differ at the four time points. Post-hoc comparisons of pairwise differences in lipid levels are illustrated with Cliff's delta ( $d$ ) as effect size.

| Time point                                     | Cholesterol (mmol/L)             | HDL-C (mmol/L)                    | LDL-C (mmol/L)                    | Triglycerides (mmol/L)            |
|------------------------------------------------|----------------------------------|-----------------------------------|-----------------------------------|-----------------------------------|
| Baseline                                       | 4.1 (3.5, 5.1)                   | 1.2 (1.0, 1.6)                    | 2.2 (1.7, 3.0)                    | 1.4 (1.0, 2.0)                    |
| Pre-operative                                  | 4.3 (3.7, 5.2)                   | 1.1 (0.9, 1.3)                    | 2.7 (2.2, 3.5)                    | 1.4 (1.0, 1.9)                    |
| Intra-operative                                | 2.9 (2.4, 3.5)                   | 0.7 (0.6, 0.9)                    | 1.8 (1.4, 2.3)                    | 0.6 (0.4, 0.7)                    |
| Post-operative                                 | 2.8 (2.3, 3.5)                   | 0.9 (0.8, 1.1)                    | 1.6 (1.3, 2.2)                    | 1.0 (0.7, 1.3)                    |
| P <sup>‡</sup>                                 | <0.0001                          | <0.0001                           | <0.0001                           | <0.0001                           |
| <b>Post-hoc comparisons (<math>d^*</math>)</b> |                                  |                                   |                                   |                                   |
| Baseline vs. Pre-operative                     | -0.08 (-0.21, 0.06) <sup>‡</sup> | 0.25 (0.11, 0.38) <sup>‡</sup>    | -0.32 (-0.45, -0.19) <sup>‡</sup> | 0.00 (-0.14, 0.14) <sup>‡</sup>   |
| Baseline vs. Intra-operative                   | 0.69 (0.58, 0.77) <sup>‡</sup>   | 0.80 (0.71, 0.86) <sup>‡</sup>    | 0.29 (0.15, 0.42) <sup>‡</sup>    | 0.84 (0.75, 0.89)                 |
| Baseline vs. Post-operative                    | 0.70 (0.60, 0.78) <sup>‡</sup>   | 0.58 (0.46, 0.68) <sup>‡</sup>    | 0.41 (0.27, 0.53) <sup>‡</sup>    | 0.41 (0.27, 0.53) <sup>‡</sup>    |
| Intra-operative vs. Post-operative             | 0.05 (-0.09, 0.19)               | -0.42 (-0.53, -0.28) <sup>‡</sup> | 0.15 (0.01, 0.29) <sup>‡</sup>    | -0.63 (-0.72, -0.51) <sup>‡</sup> |
| Pre-operative vs. Intra-operative              | 0.72 (0.61, 0.80) <sup>‡</sup>   | 0.68 (0.57, 0.76) <sup>‡</sup>    | 0.61 (0.50, 0.71) <sup>‡</sup>    | 0.85 (0.78, 0.91) <sup>‡</sup>    |
| Pre-operative vs. Post-operative               | 0.73 (0.63, 0.81) <sup>‡</sup>   | 0.37 (0.24, 0.49) <sup>‡</sup>    | 0.69 (0.59, 0.77) <sup>‡</sup>    | 0.42 (0.29, 0.54) <sup>‡</sup>    |

<sup>‡</sup> Friedman Test; <sup>\*</sup> Mean and 95% confidence intervals are shown (note that  $d$  is positive when the lipid levels of the first time point of the comparison are greater than the levels of the second time point, and *vice versa*; <sup>‡</sup> Statistically significant (all  $p < 0.0001$ ) after Wilcoxon signed-rank test with a Bonferroni adjustment for multiple comparisons.



**Supplementary Table S7:** Association between individual lipids (in units [mmol/L]) and the outcome *postoperative stroke*. Preoperative values as well as their change during the operation (postoperative minus preoperative) are presented. The results from a multivariable (crude and adjusted to age, sex, BMI and statin) elastic net regression are presented for the entire cohort and *for those patients only who did not receive any blood transfusion perioperatively*. An OR>1 refers to increased risk and an OR<1 refers to a protective effect with respect to a unit change in a particular characteristic.

| Covariate                       | Elastic Net<br>(entire cohort: N=192) |                  | Elastic Net<br>(no blood transfusion N=127) |                  |
|---------------------------------|---------------------------------------|------------------|---------------------------------------------|------------------|
|                                 | OR                                    | OR<br>(adjusted) | OR                                          | OR<br>(adjusted) |
| <b>TC</b> (preop)               | 1.25                                  | 1.13             | 1.37                                        | 1.33             |
| <b>TC</b> ( $\Delta$ )          | 0.97                                  | 0.78             | -                                           | 0.91             |
| <b>HDL-C</b> (preops)           | -                                     | 0.46             | 1.14                                        | 1.30             |
| <b>HDL-C</b> ( $\Delta$ )       | 0.30                                  | 0.08             | -                                           | -                |
| <b>LDL-C</b> (preop)            | 1.39                                  | 1.33             | 1.54                                        | 1.47             |
| <b>LDL-C</b> ( $\Delta$ )       | 0.86                                  | 0.67             | 0.77                                        | 0.70             |
| <b>TG</b> (preop)               | -                                     | 0.91             | -                                           | 0.99             |
| <b>TG</b> ( $\Delta$ )          | -                                     | 0.92             | 1.12                                        | 1.09             |
| <b>Age</b> (yr)                 | -                                     | 1.04             | -                                           | -                |
| <b>Sex</b> (male)               | -                                     | 0.30             | -                                           | 0.67             |
| <b>BMI</b> (kg/m <sup>2</sup> ) | -                                     | 1.16             | -                                           | 1.13             |
| <b>Statin</b> (Yes)             | -                                     | 0.22             | -                                           | 0.54             |
